# Supplementary material for: Collective Human Mobility Pattern from Taxi Trips in Urban Area
Source: PubMed Central journal article supplement (PMC3329492; doi:10.1371/journal.pone.0034487), 2012-04-18
Supplement: pone.0034487.s003.pdf [file pone.0034487.s003.pdf]

# Collective Human Mobility Pattern from Taxi Trips in Urban Area

Chengbin Peng<sup>1,2</sup>, Xiaogang Jin<sup>2</sup>, Ka-Chun Wong<sup>1</sup>, Meixia Shi<sup>3</sup>, Pietro Liò<sup>4,\*</sup>

**1** Mathematical and Computer Sciences and Engineering Division, King Abdullah University of Science and Technology, Jeddah, Kingdom of Saudi Arabia

**2** Institute of Artificial Intelligence, College of Computer Science, Zhejiang University, Hangzhou, China

**3** College of Environmental and Resource Sciences, Zhejiang University, Hangzhou, China

**4** Computer Laboratory, Cambridge University, Cambridge, United Kingdom

\* E-mail: Pietro.Lio@cl.cam.ac.uk

## Supporting Information

### S3 Moment Generation Function of $\alpha$

In this section we discuss  $\alpha$  as a random variable following a normalized binomial distribution described by Eq. (10) and Eq. (11). Then the moment generating function of  $\alpha$  is

$$\begin{aligned}
 M(g) &= \langle e^{g \times \alpha} \rangle \\
 &= \sum_{\alpha \langle TN \rangle = 0}^{pn} e^{g \times \alpha} \binom{pn}{\alpha \langle TN \rangle} r^{\alpha \langle TN \rangle} (1-r)^{pn - \alpha \langle TN \rangle} \\
 &= \sum_{\alpha \langle TN \rangle = 0}^{pn} \binom{pn}{\alpha \langle TN \rangle} (r \times e^{\frac{g}{\langle TN \rangle}})^{\alpha \langle TN \rangle} (1-r)^{pn - \alpha \langle TN \rangle} \\
 &= (r \times e^{\frac{g}{\langle TN \rangle}} + (1-r))^{pn} \\
 &= (r \times e^{\frac{g}{pn \times r}} + (1-r))^{pn}
 \end{aligned} \tag{1}$$

and consequently, the first, second and third moments are as follows.

$$\begin{aligned}
 \mu_1 &= M'(g)|_{g=0} \\
 &= (r + (1-r))^{pn-1} \\
 &= 1
 \end{aligned} \tag{2}$$

$$\begin{aligned}
 \mu_2 &= M''(g)|_{g=0} \\
 &= (pn-1) \frac{1}{pn} + \frac{1}{\langle TN \rangle} \\
 &\approx \frac{1}{\langle TN \rangle}
 \end{aligned} \tag{3}$$

$$\begin{aligned}
& \mu_3 \\
& = M'''(g)|_{g=0} \\
& = \frac{pn-1}{pn} \left[ (pn-2)r \frac{1}{\langle TN \rangle} + \frac{2}{\langle TN \rangle} \right] \\
& \quad + \frac{1}{\langle TN \rangle} \left[ (pn-1)r \frac{1}{\langle TN \rangle} + \frac{1}{\langle TN \rangle} \right] \\
& \approx 1 + \frac{2}{\langle TN \rangle} + \frac{1}{\langle TN \rangle} \left( 1 + \frac{1}{\langle TN \rangle} \right) \\
& = 1 + \frac{3}{\langle TN \rangle} + \frac{1}{(\langle TN \rangle)^2}
\end{aligned} \tag{4}$$

Typically  $pn$  is quite large, so that  $pn \approx pn - 1 \approx pn - 2$ , and the approximations above are valid.

## References
